# Supplementary material
Source: MDPI journal article supplement (https://www.mdpi.com/2075-163X/10/4/294)
Supplement: s1 [file s1]

# Heterogeneous Nucleation and Growth of $\text{CaCO}_3$ on Calcite (104) and Aragonite (110) Surfaces: Implications for the Formation of Abiogenic Carbonate Cements in the Ocean

Hongmei Tang <sup>1,2,3</sup>, Xiao Wu <sup>1,2,3</sup>, Haiyang Xian <sup>1,3,\*</sup>, Jianxi Zhu <sup>1,3</sup>, Jingming Wei <sup>1,2,3</sup>, Hongmei Liu <sup>1,3</sup> and Hongping He <sup>1,2,3</sup>

<sup>1</sup> CAS Key Laboratory of Mineralogy and Metallogeny/Guangdong Provincial Key Laboratory of Mineral Physics and Materials, Guangzhou Institute of Geochemistry, Chinese Academy of Sciences (CAS), 510640 Guangzhou, China; tanghongmei@gig.ac.cn (H.T.); wuxiao@gig.ac.cn (X.W.); zhujx@gig.ac.cn (J.Z.); weijm@gig.ac.cn (J.W.); hmlu@gig.ac.cn (H.L.); hehp@gig.ac.cn (H.H.)

<sup>2</sup> University of Chinese Academy of Sciences, 100049 Beijing, China

<sup>3</sup> Institutions of Earth Science, Chinese Academy of Sciences, 100029 Beijing, China

\* Correspondence: xianhaiyang@gig.ac.cn; Tel.: +86-20-85290569

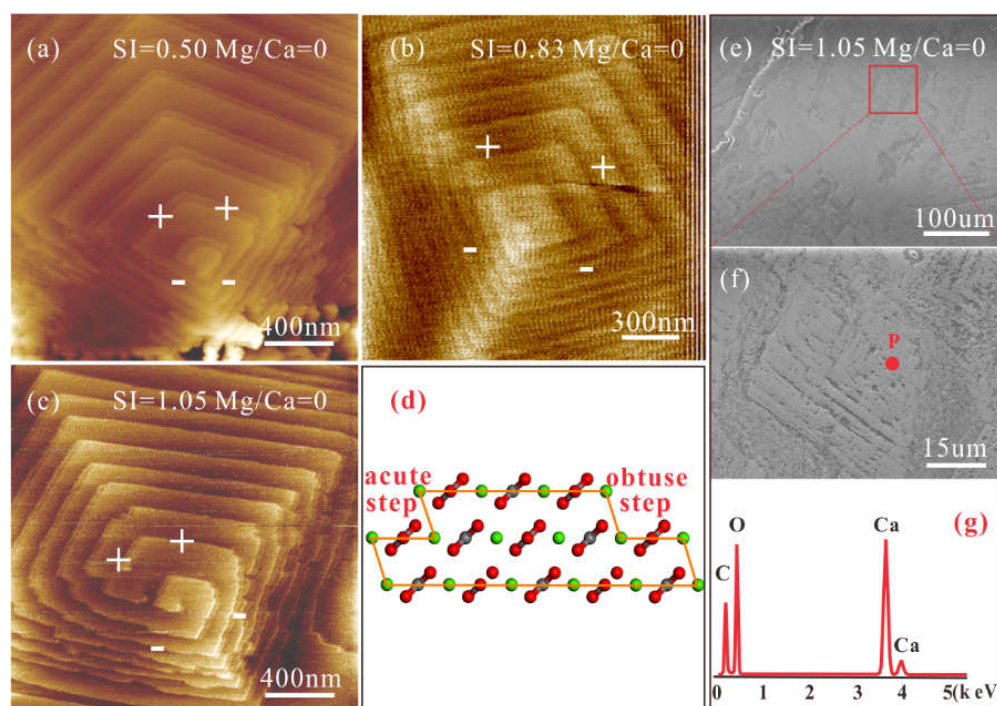

**Figure S1.** AFM height images of the calcite (104) cleavage surfaces in solutions at  $\text{Mg}^{2+}/\text{Ca}^{2+} = 0$  and  $\text{pH} = 8.0 \pm 0.1$  with (a)  $SI_{\text{calcite}} = 0.50$ ; (b)  $SI_{\text{calcite}} = 0.83$ ; (c)  $SI_{\text{calcite}} = 1.05$ . (d) Sketch of the atomic arrangements in calcite (104) surface. The cross-section illustrates the angular relationship of the acute and obtuse step edges with terraces. And SEM image with (e)  $SI_{\text{calcite}} = 1.05$ ; and (f) represents the image of the red box marked zone in (e); and (g) denotes the EDS analysis of P labeled in (f).

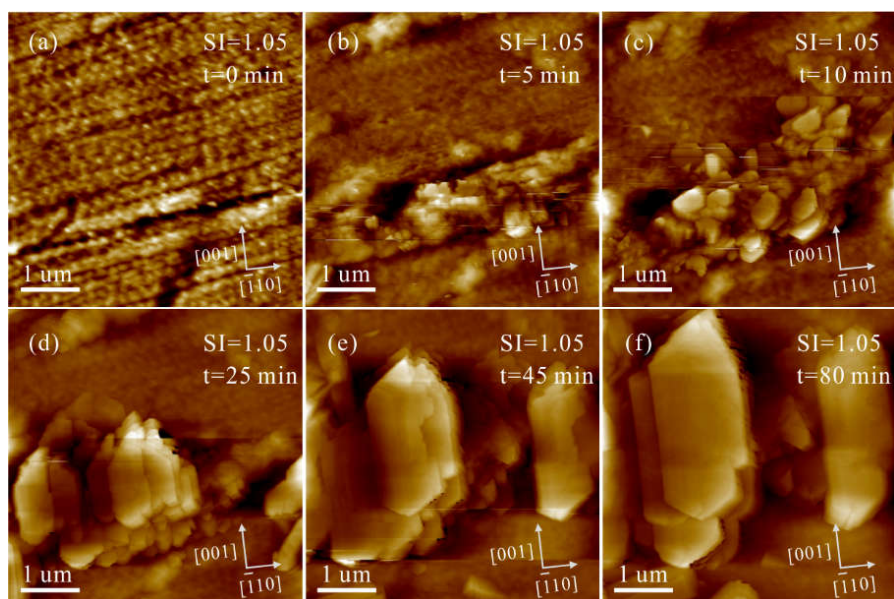

**Figure S2.** AFM height images of the polished aragonite (110) surface in solution ( $\text{Mg}^{2+}/\text{Ca}^{2+} = 0$ ,  $SI_{\text{calcite}} = 1.05$ ) under flowing conditions at  $\text{pH} = 8.0 \pm 0.1$  for (a) 0, (b) 5, (c) 10, (d) 25, (e) 45 and (f) 80 min.

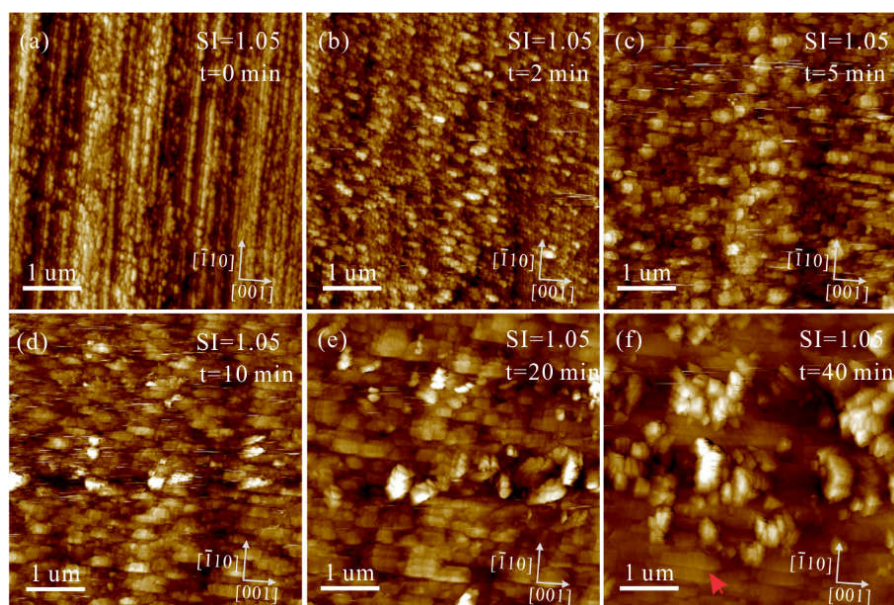

**Figure S3.** AFM height images of the polished aragonite (110) surface in solution ( $\text{Mg}^{2+}/\text{Ca}^{2+} = 3$ ,  $SI_{\text{calcite}} = 1.05$ ) under flowing conditions at  $\text{pH} = 8.0 \pm 0.1$  for (a) 0, (b) 2, (c) 5, (d) 10, (e) 20 and (f) 40 min.

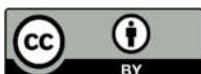

© 2020 by the authors. Submitted for possible open access publication under the terms and conditions of the Creative Commons Attribution (CC BY) license (<http://creativecommons.org/licenses/by/4.0/>).
